# Supplementary material for: Serum Antioxidant Vitamins Mediate the Association between Periodontitis and Metabolically Unhealthy Overweight/Obesity
Source: MDPI journal article supplement (doi:10.3390/nu14224939), 2022-11-21
Supplement: s1 [file s1]

Article

# Serum Antioxidant Vitamins Mediate the Association between Periodontitis and Metabolically Unhealthy Overweight/Obesity

An Li <sup>1,2,†</sup>, Zhi Tang <sup>3,†</sup>, Peijun Zhu <sup>1</sup>, Florian van den Bosch <sup>2</sup>, Yuntao Chen <sup>4,5</sup>, Shulan Xu <sup>1,\*</sup>  
and Geerten-Has E. Tjakkes <sup>2</sup>

## TABLE OF CONTENTS

|                                                                                                                                                                                          |   |
|------------------------------------------------------------------------------------------------------------------------------------------------------------------------------------------|---|
| Table S1. Characteristics of study population in KNHANES 2015 by periodontal status                                                                                                      | 3 |
| Table S2. Sensitivity analysis for association between periodontitis and metabolically unhealthy phenotype among population with overweight/obesity in the NHANES III <sup>a</sup> ..... | 4 |
| Table S3. Sensitivity analysis for association between periodontitis and metabolically unhealthy phenotype among population with overweight/obesity in the NHANES III <sup>a</sup> ..... | 4 |
| Table S4. Sensitivity analysis for association between periodontitis and metabolically unhealthy phenotype among population with obesity in the NHANES III <sup>a</sup> .....            | 4 |
| Table S5. Sensitivity analysis for association between periodontitis and metabolically unhealthy phenotype among population with overweight/obesity in the NHANES III.....               | 4 |
| Table S6. Sensitivity analysis for association between periodontitis and metabolically unhealthy phenotype among population with overweight/obesity in the NHANES III <sup>a</sup> ..... | 5 |
| Table S7. Weighted associations of periodontitis with metabolically unhealthy overweight/obese phenotype and the individual components in the KNHANES 2015 .....                         | 5 |

Table S8. Sensitivity analysis for association between periodontitis and metabolically unhealthy phenotype among population with overweight/obesity in the KNHANES 2015 <sup>a</sup>.....5

Table S9. Sensitivity analysis for association between periodontitis and metabolically unhealthy phenotype among population with overweight/obesity in the KNHANES 2015 <sup>a</sup>.....6

Table S10. Sensitivity analysis for association between periodontitis and metabolically unhealthy phenotype among population with obesity in the KNHANES 2015 <sup>a</sup>.....6

Table S11. Sensitivity analysis for association between periodontitis and metabolically unhealthy phenotype among population with overweight/obesity in the KNHANES 2015 <sup>a</sup>.....6

Table S12. Association between moderate/severe periodontitis and serum antioxidant vitamins in the NHANES III <sup>a</sup>.....6

Table S13. Association between serum antioxidant vitamins and MUO in the NHANES III <sup>a</sup> 7

Table S14. Sensitivity analysis for the mediating effect of serum vitamins on the periodontitis–MUO association in the NHANES III <sup>a</sup> .....7

**Supplementary Table S1.** Characteristics of study population in KNHANES 2015 by periodontal status.

|                                      | KNHANES 2015   |                 |                | <i>p</i> Value |
|--------------------------------------|----------------|-----------------|----------------|----------------|
|                                      | Overall        | CPI 0–2         | CPI 3–4        |                |
| Number                               | 2597           | 1580            | 1017           |                |
| Weighted number                      | 15312417       | 9182536         | 6129881        |                |
| Continuous variables, mean (SD)      |                |                 |                |                |
| Age, years                           | 53.37 (14.97)  | 50.50 (15.77)   | 57.85 (12.39)  | < 0.001        |
| BMI, kg/cm <sup>2</sup>              | 26.20 (2.68)   | 26.13 (2.69)    | 26.31 (2.67)   | 0.095          |
| Waist circumference, cm <sup>b</sup> | 88.56 (7.83)   | 88.03 (7.92)    | 89.37 (7.61)   | < 0.001        |
| SBP, mmHg                            | 122.40 (16.61) | 120.29 (15.72)  | 125.71 (17.43) | < 0.001        |
| DBP, mmHg                            | 77.18 (10.24)  | 76.79 (9.98)    | 77.80 (10.60)  | 0.013          |
| Fasting glucose, mg/dL               | 104.90 (27.60) | 102.00 (21.69)  | 109.41 (34.37) | < 0.001        |
| Insulin, uIU/mL <sup>a</sup>         | 8.10 (6.20)    | 8.10 (6.20)     | 8.00 (6.20)    | 0.502          |
| HbA1c, % <sup>b</sup>                | 5.80 (0.80)    | 5.71 (0.687)    | 5.94 (0.929)   | < 0.001        |
| Total cholesterol, mg/dL             | 193.34 (36.59) | 193.57 (35.579) | 193.00 (38.13) | 0.701          |
| HDL cholesterol, mg/dL               | 47.85 (11.76)  | 48.69 (11.837)  | 46.54 (11.523) | < 0.001        |
| Triglycerides, mg/dL <sup>a</sup>    | 128 (95)       | 123.5 (91)      | 135 (100.5)    | < 0.001        |
| CRP, mg/L <sup>a</sup>               | 0.70 (1.00)    | 0.68 (0.90)     | 0.72 (1.05)    | 0.005          |
| Creatinine, mg/dL <sup>a</sup>       | 0.84 (0.28)    | 0.83 (0.27)     | 0.85 (0.28)    | 0.057          |
| Number of teeth <sup>a</sup>         | 28 (1.00)      | 28 (1.0)        | 28 (1.00)      | < 0.001        |
| Categorical, <i>n</i> (%)            |                |                 |                |                |
| Gender (% female)                    | 1310 (50.4)    | 839 (53.1)      | 471 (46.3)     | 0.001          |
| Education level                      |                |                 |                |                |
| Primary school or lower              | 610 (23.5)     | 324 (20.5)      | 286 (28.1)     | < 0.001        |
| Middle/high school graduate          | 1241 (47.8)    | 726 (45.9)      | 515 (50.6)     |                |
| College or higher                    | 746 (28.7)     | 530 (33.5)      | 216 (21.2)     |                |
| Income level <sup>b</sup>            |                |                 |                |                |
| High                                 | 632 (24.4)     | 406 (25.8)      | 226 (22.4)     | 0.014          |
| Middle                               | 1303 (50.4)    | 802 (50.9)      | 501 (49.6)     |                |
| Low                                  | 650 (25.1)     | 367 (23.3)      | 283 (28.0)     |                |
| Smoking status <sup>b</sup>          |                |                 |                |                |
| Never smoker                         | 1408 (55.2)    | 915 (59.0)      | 493 (49.4)     | < 0.001        |
| Former smoker                        | 651 (25.5)     | 371 (23.9)      | 280 (28.1)     |                |
| Current smoker                       | 490 (19.2)     | 265 (17.1)      | 225 (22.5)     |                |
| Diagnosed diabetes <sup>b</sup>      | 260 (10.5)     | 136 (9.0)       | 124 (12.9)     | 0.002          |
| Diagnosed hypertension               | 824 (31.7)     | 418 (26.5)      | 406 (39.9)     | < 0.001        |
| Cardiovascular disease history       | 263 (10.1)     | 163 (10.3)      | 100 (9.8)      | 0.690          |
| Metabolic phenotype                  |                |                 |                |                |
| Hypertension                         | 901 (34.7)     | 485 (30.7)      | 416 (40.9)     | < 0.001        |
| Hyperglycemia                        | 1166 (44.9)    | 650 (41.1)      | 516 (50.7)     | < 0.001        |
| Dyslipidemia                         | 982 (37.8)     | 557 (35.3)      | 425 (41.8)     | 0.001          |
| Dyslipidemia (second criteria)       | 1113 (42.9)    | 645 (40.8)      | 468 (46.0)     | 0.009          |
| Insulin resistance                   | 259 (10.0)     | 146 (9.2)       | 113 (11.1)     | 0.120          |
| Systemic inflammation                | 259 (10.0)     | 130 (8.2)       | 129 (12.7)     | < 0.001        |
| Metabolically healthy status         |                |                 |                |                |
| MHO                                  | 1153 (44.4)    | 771 (48.8)      | 382 (37.6)     | < 0.001        |
| MUO                                  | 1444 (55.6)    | 809 (51.2)      | 635 (62.4)     |                |

<sup>a</sup> Non-normal distribution continuous variable, median (interquartile range). Independent-Samples Mann-Whitney U Test was used to compare the non-parametric variables between two groups. <sup>b</sup> Missing values in KNHANES 2015 (*n* = 2597): waist circumference (*n* = 1; 0.039%), HbA1C (*n* = 12;

0.5%), income level ( $n = 12$ ; 0.5%), smoking status ( $n = 48$ ; 1.8%), diagnosed diabetes ( $n = 121$ ; 4.7%). All  $p$ -values were calculated with a two-sided significance level of 0.05. **Abbreviations:** KNHANES, Korean National Health And Nutrition Examination Survey; CPI, community periodontal index; SD, standard deviation; BMI, body mass index; SBP, systolic blood pressure; DBP, diastolic blood pressure; HbA1c, glycohaemoglobin A1c; HDL, high-density lipoprotein; CRP, C-reactive protein; MHO, metabolically healthy overweight/obese; MUO, metabolically unhealthy overweight/obese.

**Supplementary Table S2.** Sensitivity analysis for association between periodontitis and metabolically unhealthy phenotype among population with overweight/obesity in the NHANES III <sup>a</sup>.

|                               | Case/<br>participants | Unadjusted OR<br>(95% CI)               | Adjusted OR<br>(95% CI) <sup>b</sup>    |
|-------------------------------|-----------------------|-----------------------------------------|-----------------------------------------|
| Non/mild periodontitis        | 1721/4106             | 1 [Reference]                           | 1 [Reference]                           |
| Moderate/severe periodontitis | 1215/2052             | <b>2.006</b><br><b>(1.800 to 2.236)</b> | <b>1.179</b><br><b>(1.038 to 1.339)</b> |

<sup>a</sup> Metabolically unhealthy phenotype was defined by IDF consensus definition. <sup>b</sup> Adjusted model was adjusted for age, gender, race/ethnicity, total cholesterol, creatinine, number of teeth, education level, income level, smoking status, and cardiovascular disease history. Bold indicates  $p$  value < 0.05. **Abbreviations:** NHANES III, The Third National Health and Nutrition Examination Survey; IDF, International Diabetes Federation; OR, odds ratio; CI, confidence interval.

**Supplementary Table S3.** Sensitivity analysis for association between periodontitis and metabolically unhealthy phenotype among population with overweight/obesity in the NHANES III <sup>a</sup>.

|                               | Case/<br>participants | Unadjusted OR<br>(95% CI)               | Adjusted OR<br>(95% CI) <sup>b</sup>    |
|-------------------------------|-----------------------|-----------------------------------------|-----------------------------------------|
| Non/mild periodontitis        | 1643/3750             | 1 [Reference]                           | 1 [Reference]                           |
| Moderate/severe periodontitis | 980/1651              | <b>1.870</b><br><b>(1.662 to 2.104)</b> | <b>1.201</b><br><b>(1.050 to 1.375)</b> |

<sup>a</sup> We excluded individuals with diabetes or cardiovascular disease. <sup>b</sup> Adjusted model was adjusted for age, gender, race/ethnicity, total cholesterol, creatinine, number of teeth, education level, income level, and smoking status. Bold indicates  $p$  value < 0.05. **Abbreviations:** NHANES III, The Third National Health and Nutrition Examination Survey; OR, odds ratio; CI, confidence interval.

**Supplementary Table S4.** Sensitivity analysis for association between periodontitis and metabolically unhealthy phenotype among population with obesity in the NHANES III <sup>a</sup>.

|                               | Case/<br>participants | Unadjusted OR<br>(95% CI)               | Adjusted OR<br>(95% CI) <sup>b</sup>    |
|-------------------------------|-----------------------|-----------------------------------------|-----------------------------------------|
| Non/mild periodontitis        | 986/1742              | 1 [Reference]                           | 1 [Reference]                           |
| Moderate/severe periodontitis | 642/890               | <b>1.972</b><br><b>(1.654 to 2.352)</b> | <b>1.356</b><br><b>(1.113 to 1.653)</b> |

<sup>a</sup> Population with obesity was defined by body-mass index  $\geq 30$  kg/m<sup>2</sup>. <sup>b</sup> Adjusted model was adjusted for age, gender, race/ethnicity, total cholesterol, creatinine, number of teeth, education level, income level, smoking status, and cardiovascular disease history. Bold indicates  $p$  value < 0.05. **Abbreviations:** NHANES III, The Third National Health and Nutrition Examination Survey; OR, odds ratio; CI, confidence interval.

**Supplementary Table S5.** Sensitivity analysis for association between periodontitis and metabolically unhealthy phenotype among population with overweight/obesity in the NHANES III.

|                               | Case/<br>participants | Unadjusted OR<br>(95% CI)               | Adjusted OR<br>(95% CI) <sup>a</sup>    |
|-------------------------------|-----------------------|-----------------------------------------|-----------------------------------------|
| Non/mild periodontitis        | 1893/4106             | 1 [Reference]                           | 1 [Reference]                           |
| Moderate/severe periodontitis | 1306/2052             | <b>2.037</b><br><b>(1.825 to 2.274)</b> | <b>1.210</b><br><b>(1.069 to 1.369)</b> |

<sup>a</sup> Adjusted model was adjusted for age, gender, race/ethnicity, total cholesterol, creatinine, number of teeth, education level, income level, smoking status, cardiovascular disease history, and the number of vitamins/minerals taken. Bold indicates  $p$  value < 0.05. **Abbreviations:** NHANES III, The Third National Health and Nutrition Examination Survey; OR, odds ratio; CI, confidence interval.

**Supplementary Table S6.** Sensitivity analysis for association between periodontitis and metabolically unhealthy phenotype among population with overweight/obesity in the NHANES III <sup>a</sup>.

|                               | Case/<br>participants | Unadjusted OR<br>(95% CI)               | Adjusted OR<br>(95% CI) <sup>b</sup>    |
|-------------------------------|-----------------------|-----------------------------------------|-----------------------------------------|
| Non/mild periodontitis        | 1492/3228             | 1 [Reference]                           | 1 [Reference]                           |
| Moderate/severe periodontitis | 955/1498              | <b>2.037</b><br><b>(1.794 to 2.313)</b> | <b>1.226</b><br><b>(1.061 to 1.418)</b> |

<sup>a</sup> Current smokers were excluded. <sup>b</sup> Adjusted model was adjusted for age, gender, race/ethnicity, total cholesterol, creatinine, number of teeth, education level, income level, and cardiovascular disease history. Bold indicates  $p$  value < 0.05. **Abbreviations:** NHANES III, The Third National Health and Nutrition Examination Survey; OR, odds ratio; CI, confidence interval.

**Supplementary Table S7.** Weighted associations of periodontitis with metabolically unhealthy overweight/obese phenotype and the individual components in the KNHANES 2015.

|                                                | Case/<br>Participants | Unadjusted OR<br>(95% CI)     | Adjusted OR<br>(95% CI) <sup>a</sup> |
|------------------------------------------------|-----------------------|-------------------------------|--------------------------------------|
| Metabolically unhealthy overweight/obese (MUO) |                       |                               |                                      |
| CPI 0–2                                        | 809/1580              | 1 [Reference]                 | 1 [Reference]                        |
| CPI 3–4                                        | 635/1017              | <b>1.584 (1.349 to 1.862)</b> | <b>1.245 (1.045 to 1.484)</b>        |
| Hypertension                                   |                       |                               |                                      |
| CPI 0–2                                        | 485/1580              | 1 [Reference]                 | 1 [Reference]                        |
| CPI 3–4                                        | 416/1017              | <b>1.559 (1.322 to 1.839)</b> | <b>1.196 (1.002 to 1.428)</b>        |
| Hyperglycemia                                  |                       |                               |                                      |
| CPI 0–2                                        | 650/1580              | 1 [Reference]                 | 1 [Reference]                        |
| CPI 3–4                                        | 516/1017              | <b>1.482 (1.265 to 1.738)</b> | 1.134 (0.949 to 1.354)               |
| Elevated triglycerides                         |                       |                               |                                      |
| CPI 0–2                                        | 557/1580              | 1 [Reference]                 | 1 [Reference]                        |
| CPI 3–4                                        | 425/1017              | <b>1.324 (1.126 to 1.558)</b> | <b>1.191 (1.001 to 1.417)</b>        |
| Reduced HDL cholesterol                        |                       |                               |                                      |
| CPI 0–2                                        | 645/1580              | 1 [Reference]                 | 1 [Reference]                        |
| CPI 3–4                                        | 468/1017              | <b>1.242 (1.059 to 1.456)</b> | <b>1.220 (1.026 to 1.449)</b>        |
| HOMA-IR (≥90th percentile)                     |                       |                               |                                      |
| CPI 0–2                                        | 146/1580              | 1 [Reference]                 | 1 [Reference]                        |
| CPI 3–4                                        | 113/1017              | 1.242 (0.958 to 1.611)        | 1.191 (0.900 to 1.576)               |
| CRP (≥90th percentile)                         |                       |                               |                                      |
| CPI 0–2                                        | 130/1580              | 1 [Reference]                 | 1 [Reference]                        |
| CPI 3–4                                        | 129/1017              | <b>1.645 (1.272 to 2.128)</b> | <b>1.367 (1.044 to 1.788)</b>        |

<sup>a</sup> Adjusted model was adjusted for age, gender, total cholesterol, creatinine, number of teeth, education level, income level, smoking status, and cardiovascular disease history. Bold indicates  $p$  value < 0.05. **Abbreviations:** KNHANES, Korean National Health And Nutrition Examination Survey; CPI, community periodontal index; HDL, high-density lipoprotein; HOMA-IR, homoeostasis model assessment of insulin resistance; CRP, C-reactive protein. OR, odds ratio; CI, confidence interval.

**Supplementary Table S8.** Sensitivity analysis for association between periodontitis and metabolically unhealthy phenotype among population with overweight/obesity in the KNHANES 2015 <sup>a</sup>.

|  | Case/<br>participants | Unadjusted OR<br>(95% CI) | Adjusted OR<br>(95% CI) |
|--|-----------------------|---------------------------|-------------------------|
|--|-----------------------|---------------------------|-------------------------|

|         |          |                                         |                                         |
|---------|----------|-----------------------------------------|-----------------------------------------|
| CPI 0-2 | 735/1580 | 1 [Reference]                           | 1 [Reference]                           |
| CPI 3-4 | 595/1017 | <b>1.620</b><br><b>(1.381 to 1.901)</b> | <b>1.278</b><br><b>(1.078 to 1.516)</b> |

<sup>a</sup> Metabolically unhealthy phenotype was defined by IDF consensus definition. <sup>b</sup> Adjusted Model was adjusted for age, gender, total cholesterol, creatinine, number of teeth, education level, income level, smoking status, and cardiovascular disease history. Bold indicates *p* value < 0.05. **Abbreviations:** KNHANES, Korean National Health And Nutrition Examination Survey; IDF, International Diabetes Federation; CPI, community periodontal index; OR, odds ratio; CI, confidence interval.

**Supplementary Table S9.** Sensitivity analysis for association between periodontitis and metabolically unhealthy phenotype among population with overweight/obesity in the KNHANES 2015 <sup>a</sup>.

|         | Case/<br>participants | Unadjusted OR<br>(95% CI)               | Adjusted OR<br>(95% CI)                 |
|---------|-----------------------|-----------------------------------------|-----------------------------------------|
| CPI 0-2 | 588/1236              | 1 [Reference]                           | 1 [Reference]                           |
| CPI 3-4 | 444/754               | <b>1.632</b><br><b>(1.376 to 1.934)</b> | <b>1.269</b><br><b>(1.058 to 1.522)</b> |

<sup>a</sup> We excluded individuals with diabetes or cardiovascular disease. <sup>b</sup> Adjusted model was adjusted for age, gender, total cholesterol, creatinine, number of teeth, education level, income level, and smoking status. Bold indicates *p* value < 0.05. **Abbreviations:** KNHANES, Korean National Health And Nutrition Examination Survey; CPI, community periodontal index; OR, odds ratio; CI, confidence interval.

**Supplementary Table S10.** Sensitivity analysis for association between periodontitis and metabolically unhealthy phenotype among population with obesity in the KNHANES 2015 <sup>a</sup>.

|         | Case/<br>participants | Unadjusted OR<br>(95% CI) | Adjusted OR<br>(95% CI) <sup>b</sup> |
|---------|-----------------------|---------------------------|--------------------------------------|
| CPI 0-2 | 262/376               | 1 [Reference]             | 1 [Reference]                        |
| CPI 3-4 | 185/253               | 1.184<br>(0.831 to 1.687) | 1.123<br>(0.806 to 1.565)            |

<sup>a</sup> Population with obesity was defined by body-mass index  $\geq 27.5$  kg/m<sup>2</sup>. <sup>b</sup> Adjusted Model was adjusted for age, gender, total cholesterol, creatinine, number of teeth, education level, income level, smoking status, and cardiovascular disease history. Bold indicates *p* value < 0.05. **Abbreviations:** KNHANES, Korean National Health And Nutrition Examination Survey; CPI, community periodontal index; OR, odds ratio; CI, confidence interval.

**Supplementary Table S11.** Sensitivity analysis for association between periodontitis and metabolically unhealthy phenotype among population with overweight/obesity in the KNHANES 2015 <sup>a</sup>.

|         | Case/<br>participants | Unadjusted OR<br>(95% CI)               | Adjusted OR<br>(95% CI) <sup>b</sup> |
|---------|-----------------------|-----------------------------------------|--------------------------------------|
| CPI 0-2 | 652/1286              | 1 [Reference]                           | 1 [Reference]                        |
| CPI 3-4 | 465/773               | <b>1.468</b><br><b>(1.225 to 1.759)</b> | 1.152<br>(0.951 to 1.397)            |

<sup>a</sup> Current smokers were excluded. <sup>b</sup> Adjusted model was adjusted for age, gender, total cholesterol, creatinine, number of teeth, education level, income level, and cardiovascular disease history. Bold indicates *p* value < 0.05. **Abbreviations:** KNHANES, Korean National Health And Nutrition Examination Survey; CPI, community periodontal index; OR, odds ratio; CI, confidence interval.

**Supplementary Table S12.** Association between moderate/severe periodontitis and serum antioxidant vitamins in the NHANES III <sup>a</sup>.

| Moderate/severe<br>periodontitis | Unadjusted beta coefficient<br>(95% CI) | Adjusted beta coefficient<br>(95% CI) <sup>b</sup> |
|----------------------------------|-----------------------------------------|----------------------------------------------------|
| Serum vitamin A                  | 0.174<br>(0.121 to 0.228)               | -0.060<br>(-0.112 to -0.008)                       |

|                 |                                            |                                            |
|-----------------|--------------------------------------------|--------------------------------------------|
| Serum vitamin C | <b>-0.152</b><br><b>(-0.206 to -0.098)</b> | <b>-0.167</b><br><b>(-0.224 to -0.109)</b> |
| Serum vitamin D | -0.038<br>(-0.091 to 0.016)                | <b>-0.120</b><br><b>(-0.176 to -0.063)</b> |
| Serum vitamin E | <b>0.138</b><br><b>(0.085 to 0.192)</b>    | <b>-0.132</b><br><b>(-0.179 to -0.085)</b> |

<sup>a</sup>The serum antioxidant vitamins were transformed as Z-score and regarded as the outcome variable in the linear regression models. <sup>b</sup> Adjusted Model was adjusted for age, gender, total cholesterol, creatinine, number of teeth, education level, income level, smoking status, and cardiovascular disease history. Bold indicates *p* value < 0.05. **Abbreviations:** NHANES III, The Third National Health and Nutrition Examination Survey; CI, confidence interval.

**Supplementary Table S13.** Association between serum antioxidant vitamins and MUO in the NHANES III <sup>a</sup>.

| MUO             | Unadjusted OR (95% CI)                  | Adjusted OR (95% CI)                    |
|-----------------|-----------------------------------------|-----------------------------------------|
| Serum vitamin A | <b>1.351</b><br><b>(1.281 to 1.425)</b> | 0.899<br>(0.777 to 1.041)               |
| Serum vitamin C | <b>0.882</b><br><b>(0.837 to 0.928)</b> | <b>0.827</b><br><b>(0.780 to 0.877)</b> |
| Serum vitamin D | 0.963<br>(0.916 to 1.013)               | <b>0.830</b><br><b>(0.780 to 0.883)</b> |
| Serum vitamin E | <b>1.912</b><br><b>(1.781 to 2.053)</b> | 0.966<br>(0.833 to 1.121)               |

<sup>a</sup>The serum antioxidant vitamins were transformed as Z-score and regarded as the exposure variable in the Logistic regression models. <sup>b</sup> Adjusted Model was adjusted for age, gender, total cholesterol, creatinine, number of teeth, education level, income level, smoking status, and cardiovascular disease history. Bold indicates *p* value < 0.05. **Abbreviations:** NHANES III, The Third National Health and Nutrition Examination Survey; MUO, metabolically unhealthy overweight/obese; OR, odds ratio; CI, confidence interval.

**Supplementary Table S14.** Sensitivity analysis for the mediating effect of serum vitamins on the periodontitis–MUO association in the NHANES III <sup>a</sup>.

|                               | Cases/<br>Participants | Model 1 <sup>a</sup><br>OR1 (95% CI) | Model 2 <sup>a</sup><br>OR2 (95% CI) | % excess risk<br>explained <sup>b</sup> |
|-------------------------------|------------------------|--------------------------------------|--------------------------------------|-----------------------------------------|
| Vitamin C                     |                        |                                      |                                      |                                         |
| Non/mild periodontitis        | 1492/3228              | 1 [Reference]                        | 1 [Reference]                        | 22.1%                                   |
| Moderate/severe periodontitis | 955/1498               | 1.226<br>(1.061 to 1.418) **         | 1.176<br>(1.014 to 1.363) *          |                                         |
| Vitamin D                     |                        |                                      |                                      |                                         |
| Non/mild periodontitis        | 1492/3228              | 1 [Reference]                        | 1 [Reference]                        | 8.8%                                    |
| Moderate/severe periodontitis | 955/1498               | 1.226<br>(1.061 to 1.418) **         | 1.206<br>(1.042 to 1.396) *          |                                         |

<sup>a</sup>Current smokers were excluded. <sup>b</sup> Model 1 was adjusted for age, gender, race/ethnicity, total cholesterol, creatinine, number of teeth, education level, income level, and cardiovascular disease history. Model 2 was further adjusted for serum vitamins. The formula  $\frac{(OR1-OR2)}{(OR1-1)} \times 100$  was used to determine the percentage of excess risk explained by serum vitamins, where OR1 is the hazard ratio of Model 1 and OR2 is the hazard ratio of Model 2. \* indicates *p* < 0.05; \*\* indicates *p* < 0.01; \*\*\* indicates *p* < 0.001. **Abbreviation:** NHANES III, The Third National Health and Nutrition Examination Survey; OR, odds ratio; CI, confidence interval.
